# Supplementary material for: Promoting polysulfide redox kinetics by tuning the non-metallic p-band of Mo-based compounds
Source: Royal Society of Chemistry journal article supplement (doi:10.1039/d2ta02456j), 2022-01-01
Supplement: d2ta02456j1.pdf [file d2ta02456j1.pdf]

## Supporting Information

### Promoting Polysulfide Redox Kinetics by Tuning Non-metallic *p*-Band of Mo-based compounds

Yajing Liu,<sup>a,b,†</sup> Jie Xu,<sup>b,†</sup> Yongjie Cao,<sup>b</sup> Mingqi Chen,<sup>c</sup> Nan Wang,<sup>b</sup> Donghui Long,<sup>c</sup>

Yonggang Wang,<sup>b</sup> Yongyao Xia,<sup>b\*</sup>

<sup>a</sup> College of Chemistry and Chemical Engineering, Qinghai Normal University, Xining, 810016, China

<sup>b</sup> Department of Chemistry and Shanghai Key Laboratory of Molecular Catalysis and Innovative Materials, Institute of New Energy, iChEM (Collaborative Innovation Center of Chemistry for Energy Materials), Fudan University, Shanghai 200433, China

<sup>c</sup> State Key Laboratory of Chemical Engineering, East China University of Science and Technology, Shanghai 200237, China

\*E-mail: [yyxia@fudan.edu.cn](mailto:yyxia@fudan.edu.cn)

† Y.L. and J.X. contributed equally to this work.

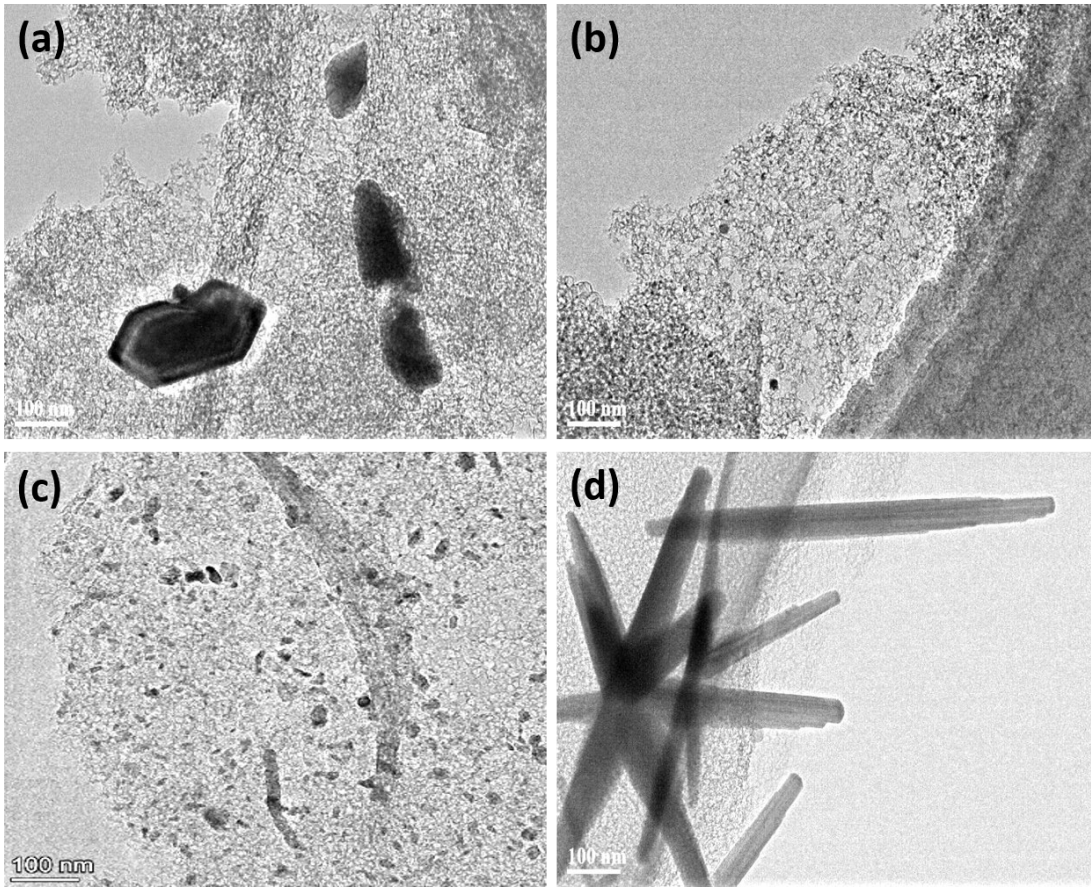

**Fig. S1.** (a-d) The TEM images of MCNs-MoO<sub>2</sub>, MCNs-MoS<sub>2</sub>, MCNs-MoN and MCNs-MoP, respectively.

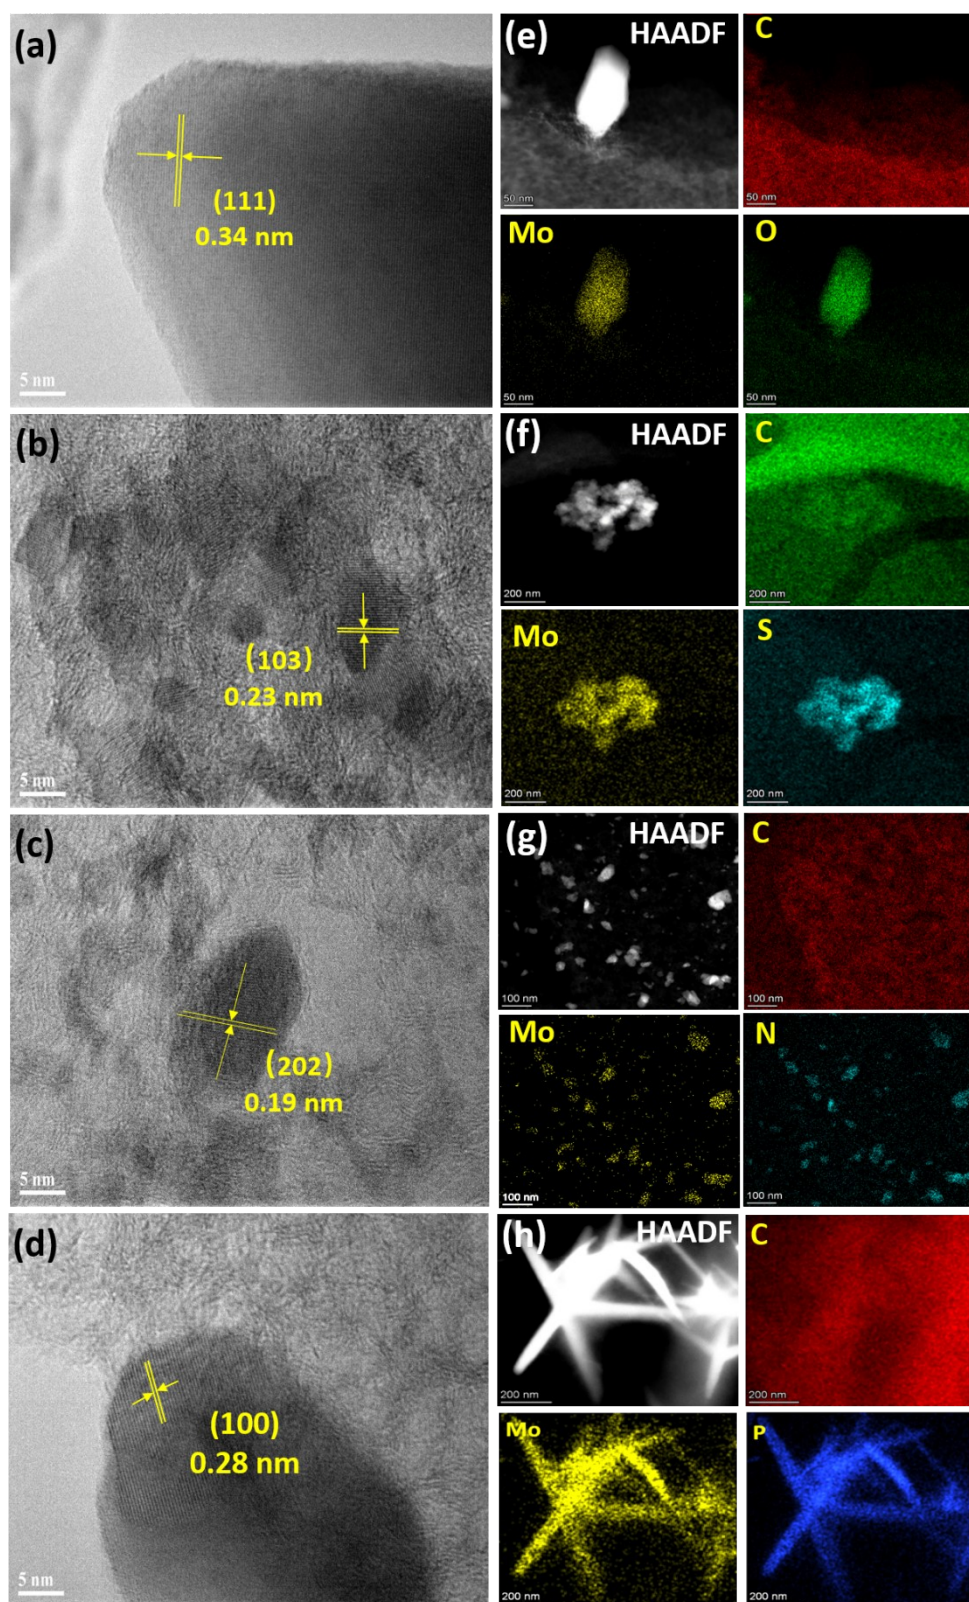

**Fig. S2.** (a-d) The HRTEM images of MCNs-MoO<sub>2</sub>, MCNs-MoS<sub>2</sub>, MCNs-MoN and MCNs-MoP. (e-h) The corresponding elemental mapping images.

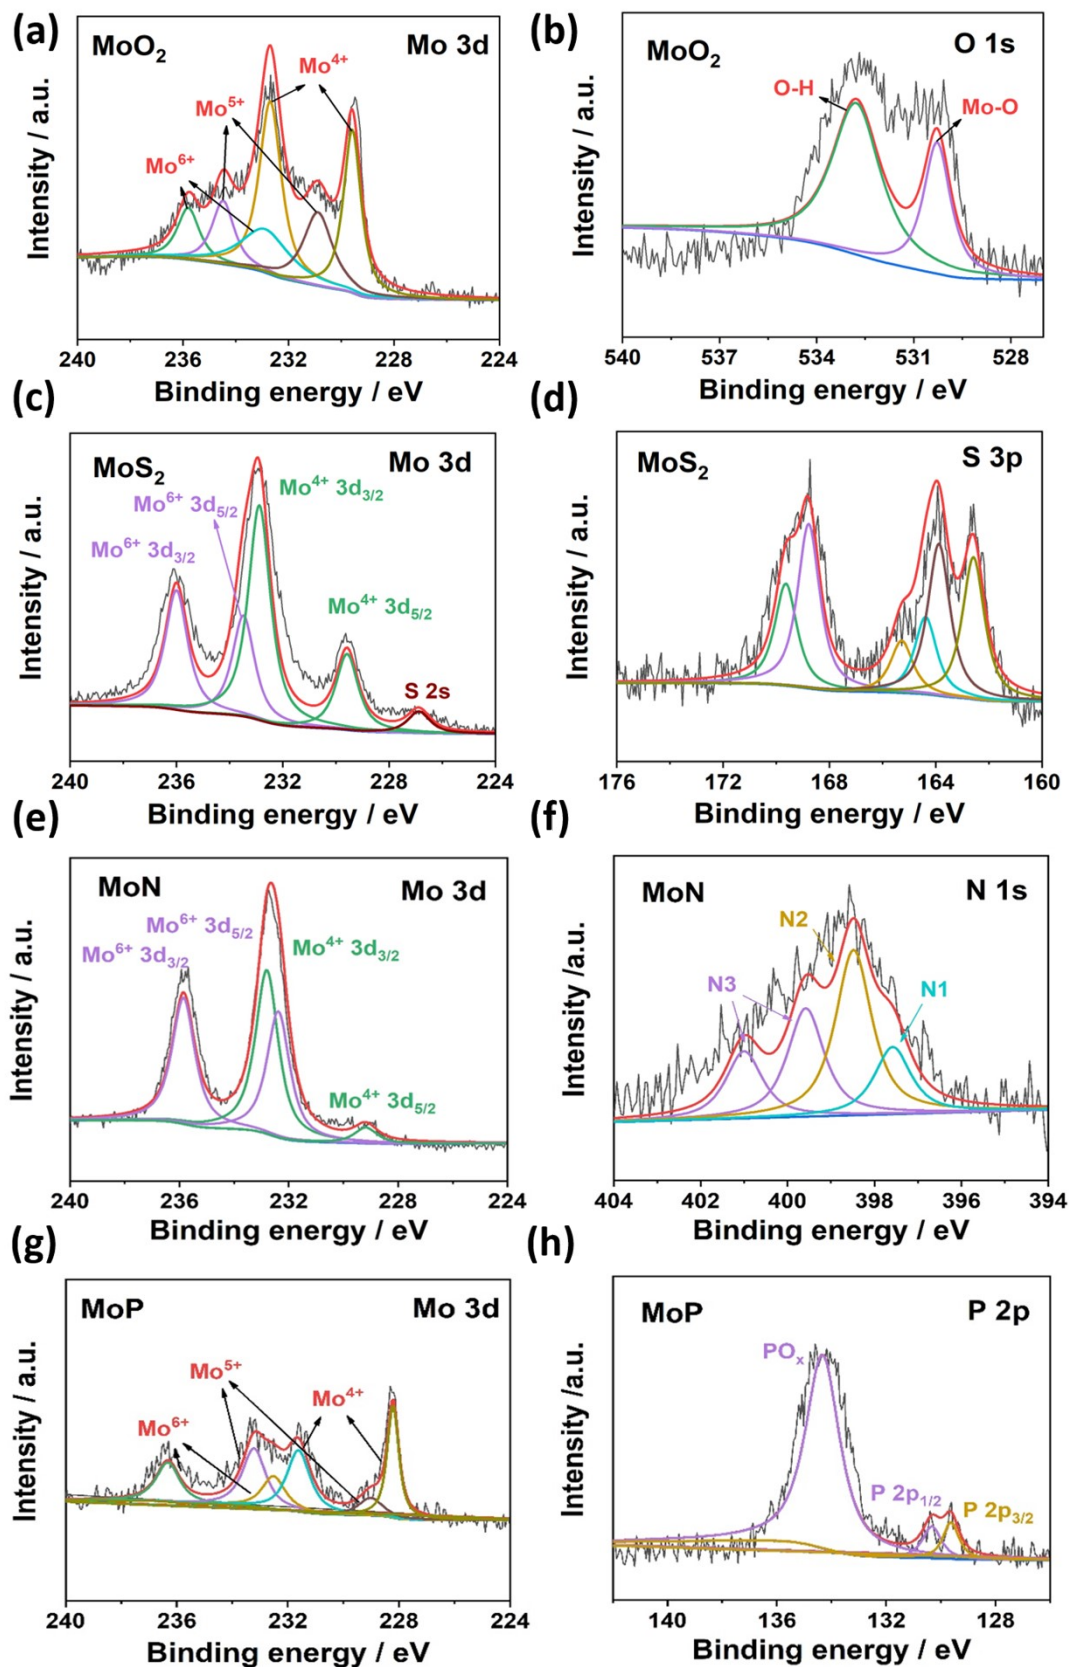

Fig. S3. The XPS core-level spectra of the prepared MCNs-Mo-based compounds.



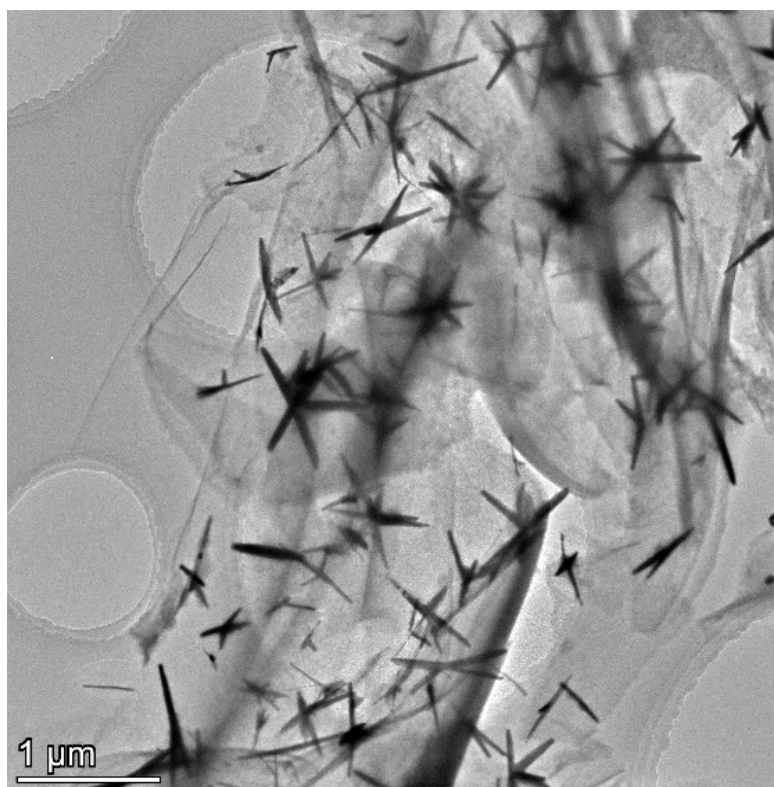

**Fig. S4.** The TEM images of MCNs-MoP.

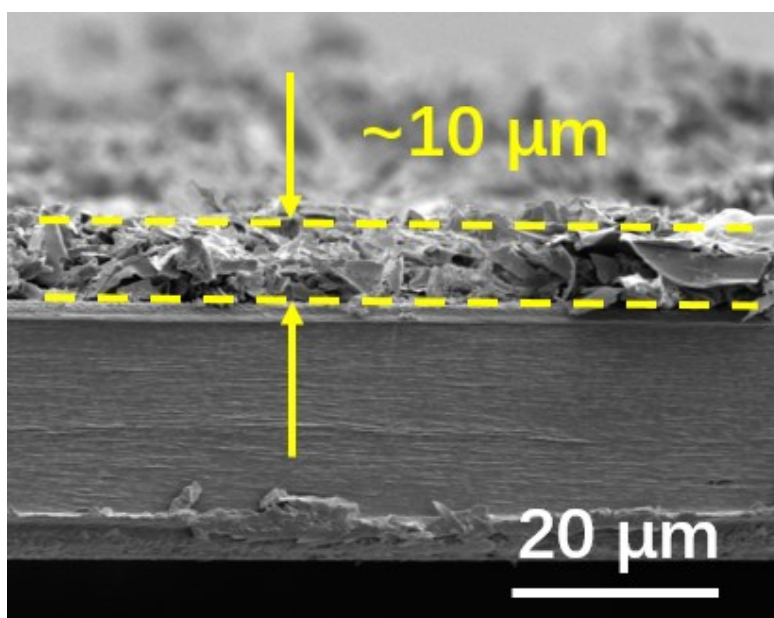

**Fig. S5.** Cross-sectional SEM image of MCNs-MoP separator.

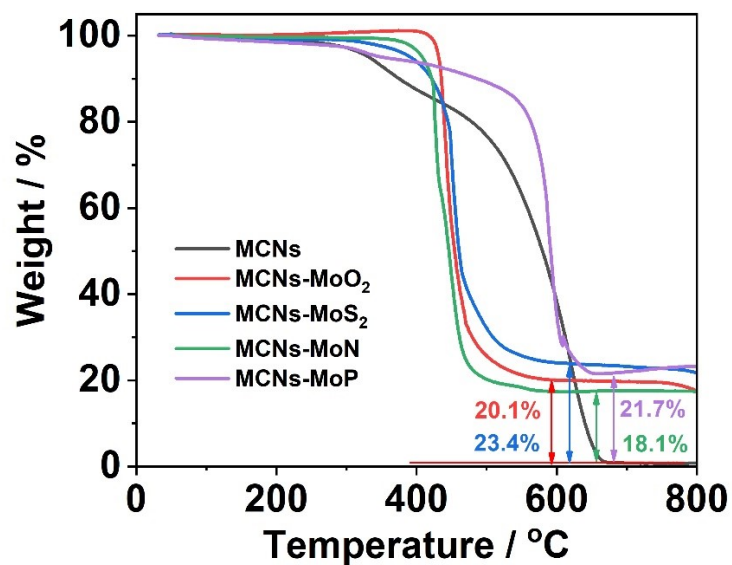

**Fig. S6.** TG profile of the MCNs, MCNs-MoO<sub>2</sub>, MCNs-MoS<sub>2</sub>, MCNs-MoN, and MCNs-MoP in air atmosphere.

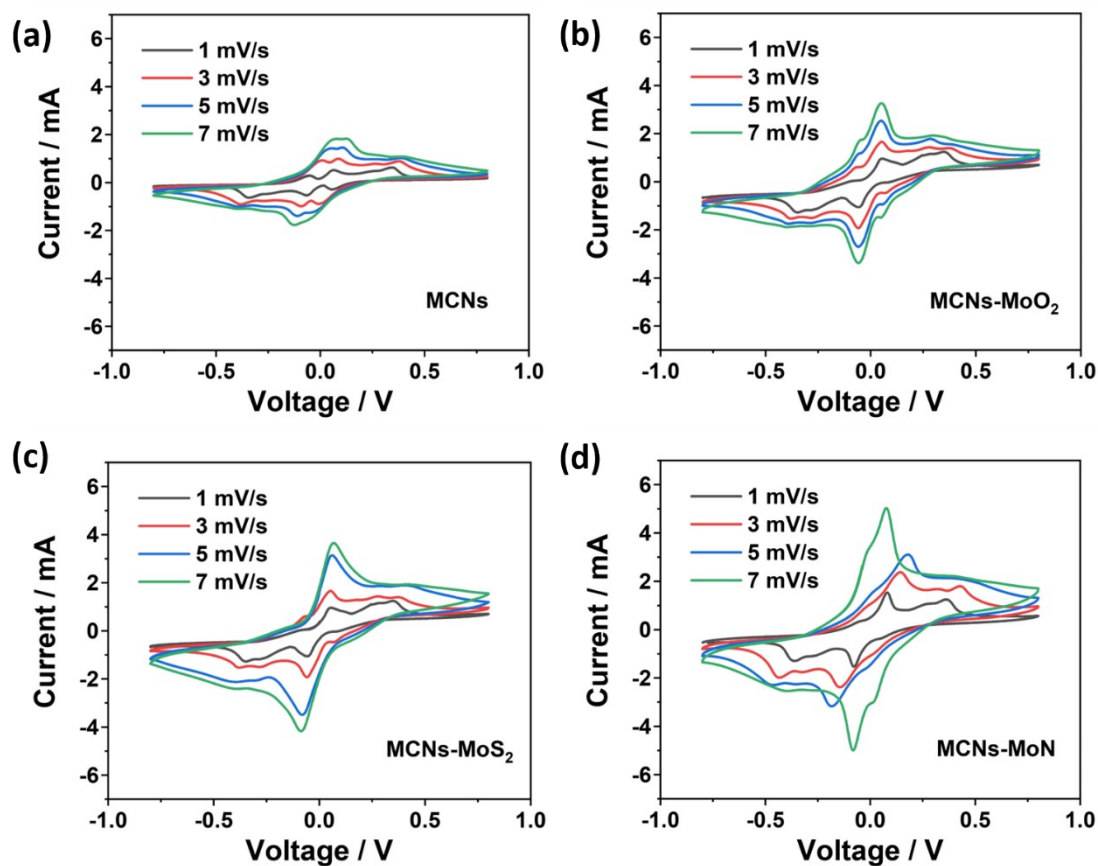

**Fig. S7.** The CV curves of (a) MCNs, (b) MCNs-MoO<sub>2</sub>, (c) MCNs-MoS<sub>2</sub> and (d) MCNs-MoN in symmetric cells with different scan rates.

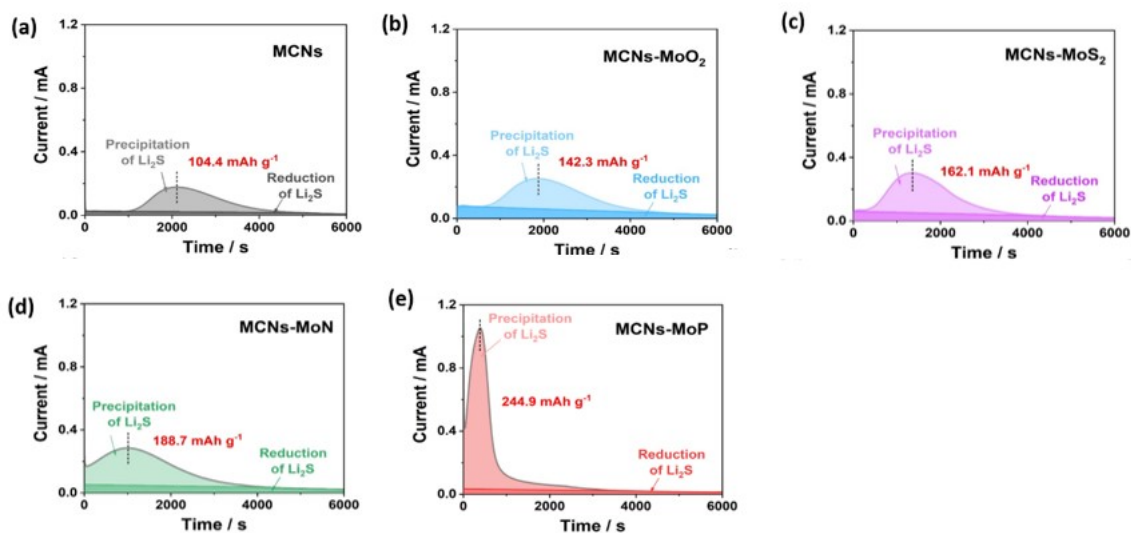

**Fig. S8.** Potentiostatic discharge of  $\text{Li}_2\text{S}_6$  electrolyte on (a) MCNs, (b) MCNs-MoO<sub>2</sub>, (c) MCNs-MoS<sub>2</sub>, (d) MCNs-MoN<sub>2</sub> and (e) MCNs-MoP electrodes at 2.05 V. The dark and light colors indicate the reduction of  $\text{Li}_2\text{S}_6$  and the precipitation of  $\text{Li}_2\text{S}$ , respectively.

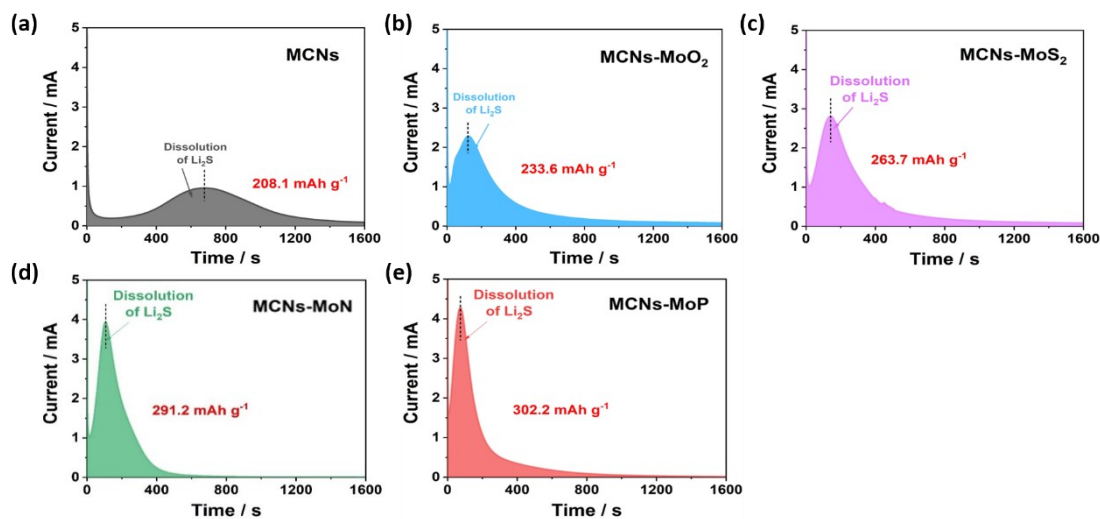

**Fig. S9.** Potentiostatic charge profiles at 2.40 V on (a) MCNs, (b) MCNs-MoO<sub>2</sub>, (c) MCNs-MoS<sub>2</sub>, (d) MCNs-MoN<sub>2</sub> and (e) MCNs-MoP electrodes to evaluate dissolution behaviors of  $\text{Li}_2\text{S}$ .

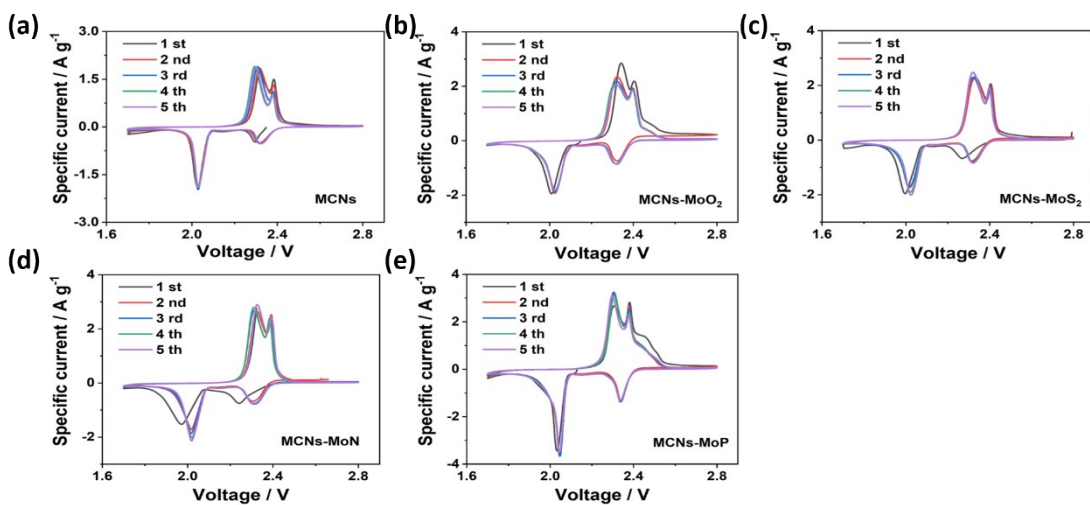

**Fig. S10.** (a-e) CV profiles of MCNs, MCNs-MoO<sub>2</sub>, MCNs-MoS<sub>2</sub>, MCNs-MoN<sub>2</sub> and MCNs-MoP configuration at a scan rate of 0.1 mV s<sup>-1</sup> in first five cycles.

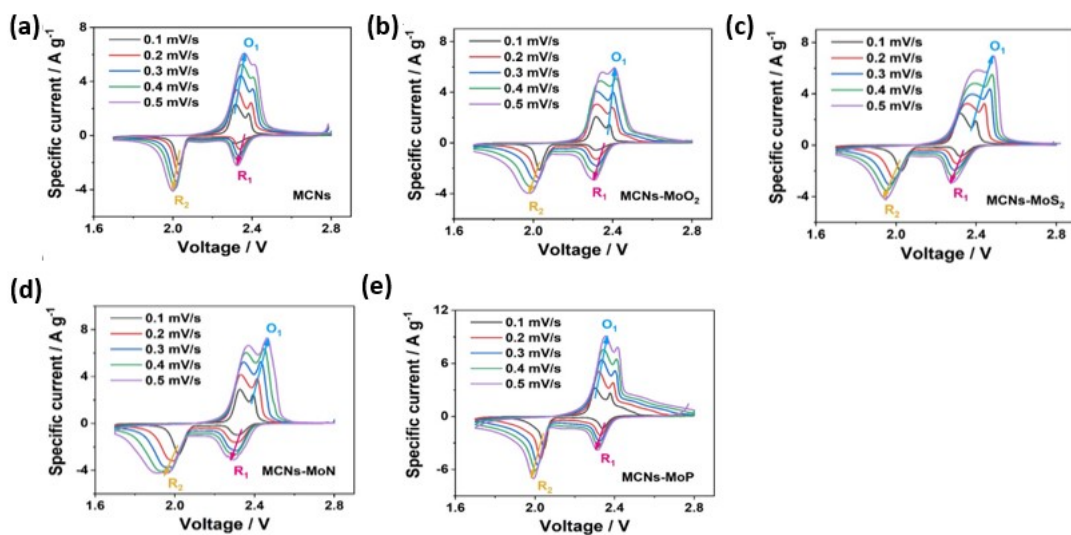

**Fig. S11.** (a-e) CV profiles of MCNs, MCNs-MoO<sub>2</sub>, MCNs-MoS<sub>2</sub>, MCNs-MoN<sub>2</sub> and MCNs-MoP configuration at 0.1-0.5 mV s<sup>-1</sup>.



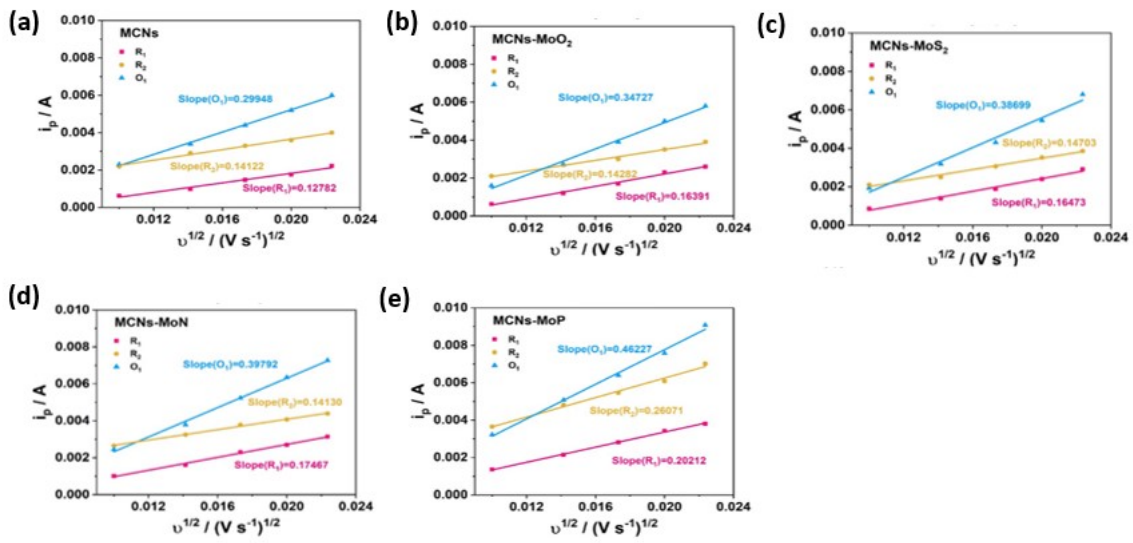

Fig. S12. (a-e) The corresponding linear plot of peak current.

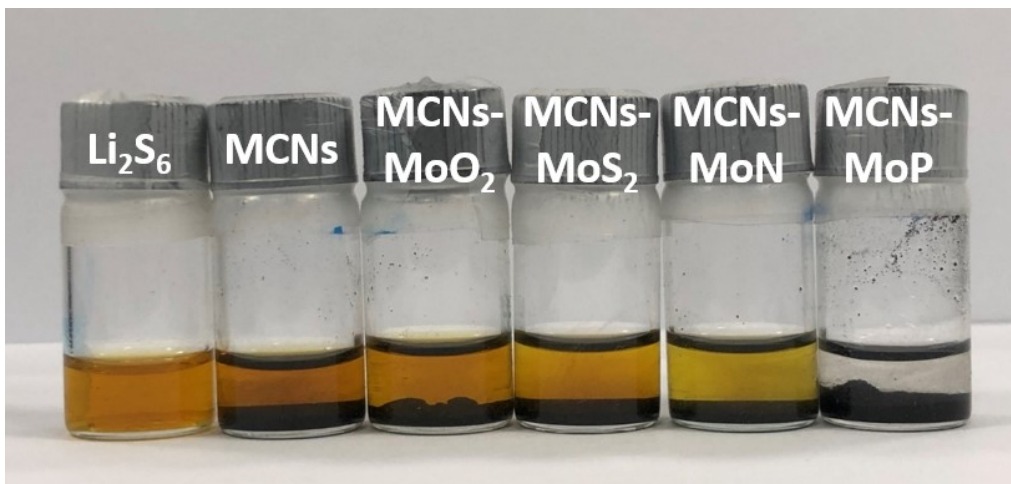

Fig. S13 The photograph of  $Li_2S_6$  solution after contact with MCNs, MCNs-MoO<sub>2</sub>, MCNs-MoS<sub>2</sub>, MCNs-MoN, and MCNs-MoP for 12h.

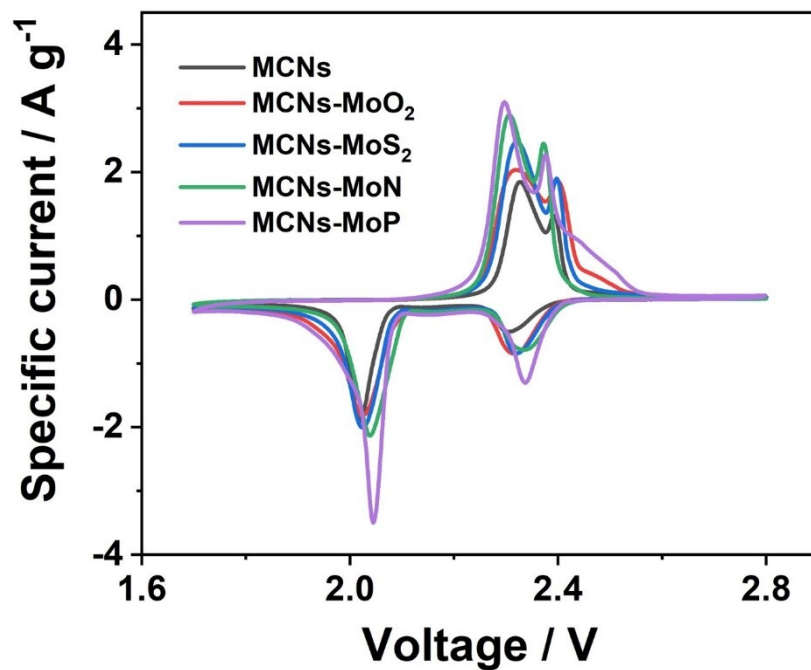

**Fig. S14.** The CV curves of MCNs, MCNs-MoO<sub>2</sub>, MCNs-MoS<sub>2</sub>, MCNs-MoN<sub>2</sub> and MCNs-MoP cells within the voltage window of 1.7-2.8 V at the scan rate of 0.1 mV s<sup>-1</sup>.

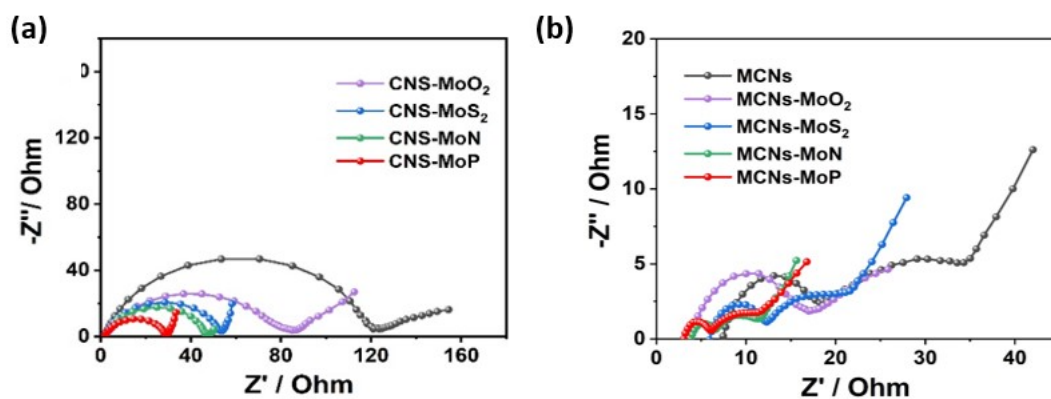

**Fig. S15.** EIS spectra of cells with different separators before (a) and after 100 cycling (b).

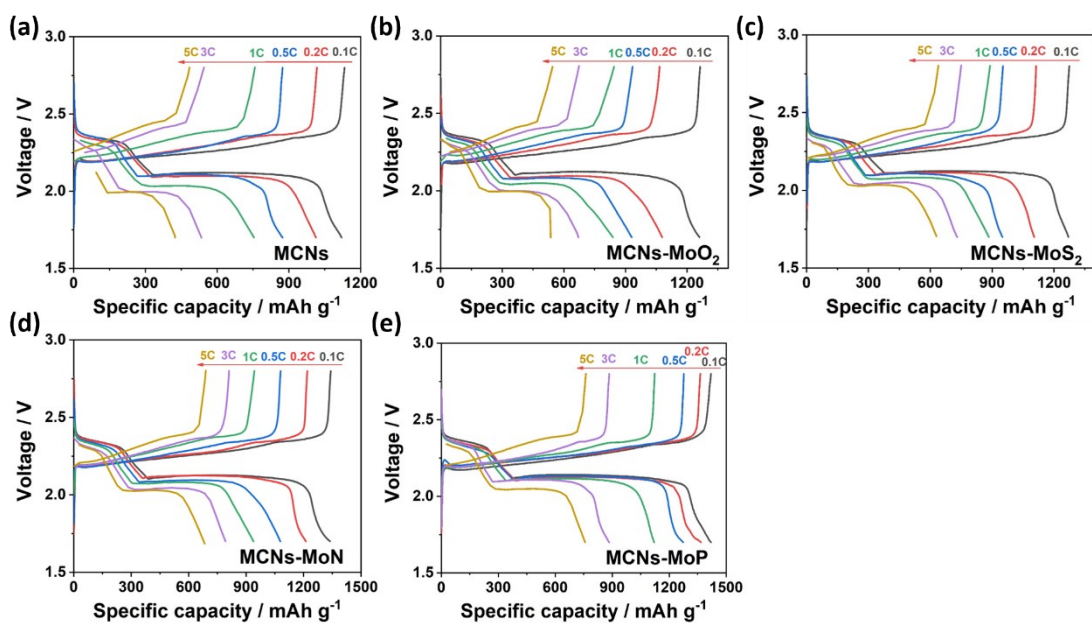

**Fig. S16.** The galvanostatic discharge/charge profiles of the electrodes at different rates. **(a-e)** The discharge/charge profiles of MCNs, MCNs-MoO<sub>2</sub>, MCNs-MoS<sub>2</sub>, MCNs-MoN<sub>2</sub> and MCNs-MoP cells at the rates varying from 0.1 to 5 C, respectively.

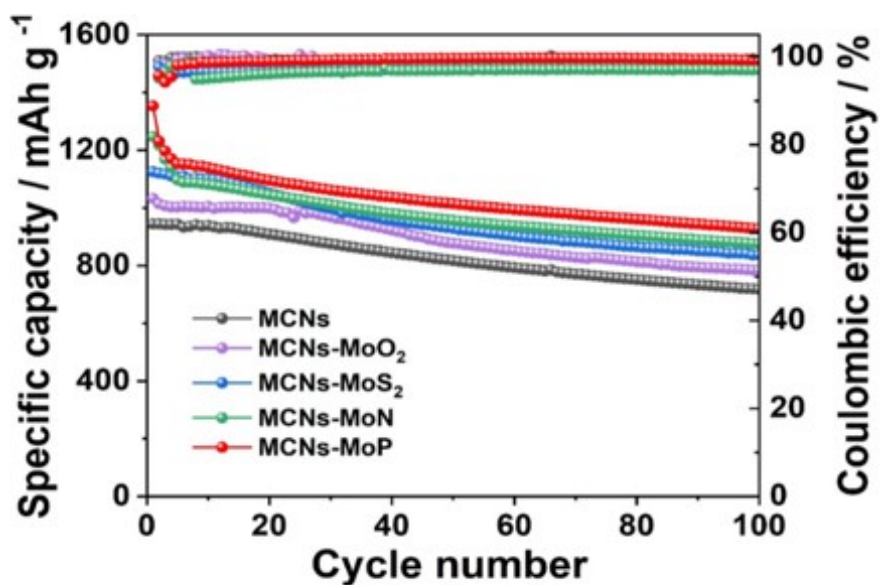

**Fig. S17.** Coulombic efficiency and cycling performance of all separators at 0.2 C.

**Table S1.** Summary of Li<sup>+</sup> diffusion coefficients ( $D_{Li^+}$ ) for different separators

| Sample                | $D_{Li^+}$ at peak R <sub>1</sub>  | $D_{Li^+}$ at peak R <sub>2</sub>  | $D_{Li^+}$ at peak O <sub>1</sub>  |
|-----------------------|------------------------------------|------------------------------------|------------------------------------|
|                       | [cm <sup>2</sup> s <sup>-1</sup> ] | [cm <sup>2</sup> s <sup>-1</sup> ] | [cm <sup>2</sup> s <sup>-1</sup> ] |
| MCNs                  | 2.94*10 <sup>-9</sup>              | 9.77*10 <sup>-9</sup>              | 2.13 *10 <sup>-8</sup>             |
| MCNs-MoO <sub>2</sub> | 5.2*10 <sup>-9</sup>               | 1.03*10 <sup>-8</sup>              | 2.21*10 <sup>-8</sup>              |
| MCNs-MoS <sub>2</sub> | 5.46*10 <sup>-9</sup>              | 1.08*10 <sup>-8</sup>              | 2.91*10 <sup>-8</sup>              |
| MCNs-MoN              | 5.89*10 <sup>-9</sup>              | 1.13*10 <sup>-8</sup>              | 3.26*10 <sup>-8</sup>              |
| MCNs-MoP              | 8.86*10 <sup>-9</sup>              | 3.00*10 <sup>-8</sup>              | 5.06*10 <sup>-8</sup>              |

**Table S2.** Comparison of electrochemical performance of this work with previous excellent works involving MCNs-MoP separators using carbon-sulfur cathodes in Li-S batteries.

| Separator                               | Initial capacity<br>mAh g <sup>-1</sup> | Capacity retention<br>mAh g <sup>-1</sup> | Cycles | Fading rate per<br>cycle % | Rate capacity<br>mAh g <sup>-1</sup> | Sulfur Loading<br>mg cm <sup>-2</sup> | Ref. |
|-----------------------------------------|-----------------------------------------|-------------------------------------------|--------|----------------------------|--------------------------------------|---------------------------------------|------|
| MoO <sub>3</sub> @CNT                   | ~1200<br>(1 C)                          | 641                                       | 400    | 0.11                       | 655<br>(3 C)                         | 1.0                                   | (1)  |
| MoO <sub>3</sub>                        | 1377 (0.5<br>C)                         | 684                                       | 200    | 0.25                       | 1074<br>(1 C)                        | 0.9-1.0                               | (2)  |
| MoS <sub>2</sub> /Celgard               | 808<br>(0.5 C)                          | 401                                       | 600    | 0.083                      | 550<br>(1 C)                         | /                                     | (3)  |
| LDH@NG                                  | 812<br>(2 C)                            | 337                                       | 999    | 0.06                       | 709<br>(2 C)                         | 1.2                                   | (4)  |
| MoN-G                                   | 1061<br>(0.5 C)                         | 678                                       | 500    | 0.072                      | 606<br>(2 C)                         | ~0.8<br>(Li <sub>2</sub> S)           | (5)  |
| Edg-MoS <sub>2</sub> /C                 | 935<br>(1C)                             | 494                                       | 1000   | 0.047                      | 602<br>(5 C)                         | 1.7                                   | (6)  |
| Co <sub>9</sub> S <sub>8</sub> -Celgard | 1385<br>(0.1 C)                         | 1190                                      | 200    | 0.070                      | 428 (2<br>C)                         | 2                                     | (7)  |
| N,S-Mo <sub>2</sub> C/C-                | ~1000                                   | 524                                       | 600    | 0.08                       | 630                                  | 0.9-1.3                               | (8)  |



|                                    |                                  |              |            |              |                                |                |                  |
|------------------------------------|----------------------------------|--------------|------------|--------------|--------------------------------|----------------|------------------|
| ACF                                | (1C)                             |              |            |              | (5 C)                          |                |                  |
| KB/Mo <sub>2</sub> C               | 813<br>(1C)                      | 439          | 600        | 0.076        | 437<br>(3.5 C)                 | 1.2            | (9)              |
| CoS <sub>2</sub> /NSCNHF@<br>C-200 | 960.9<br>(0.5C)                  | 661.3        | 100        | 0.312        | 532.1<br>(2 C)                 | 2              | (10)             |
| CuNWs-<br>GN/PI/LLZO               | ~1200<br>(0.5A g <sup>-1</sup> ) | ~500         | 300        | 0.194        | 488.3<br>(2A g <sup>-1</sup> ) | 3              | (11)             |
| <b>MCNs-MoP</b>                    | <b>1218.0</b><br><b>(0.5C)</b>   | <b>640.8</b> | <b>500</b> | <b>0.09%</b> | <b>756.7</b><br><b>(5C)</b>    | <b>1.3-1.5</b> | <b>This work</b> |

**Table S3.** Comparison of the low-temperature performance of Li-S batteries with representative work.

| Separator                      | Cathode                  | Temperature<br>°C | Rate<br>performance<br>mAh g <sup>-1</sup> |                    | Cycle<br>Performance<br>mAh g <sup>-1</sup> | Ref              |
|--------------------------------|--------------------------|-------------------|--------------------------------------------|--------------------|---------------------------------------------|------------------|
|                                |                          |                   | 1C                                         | 2C                 |                                             |                  |
| PP                             | rGO-MoSe <sub>2</sub>    | 0<br>-25          | 779<br>272                                 |                    | 538 (500th, 0.5C)<br>253 (500th, 0.5C)      | (12)             |
| Ni <sub>3</sub> Fe@HPC-<br>CNT | Pure S                   | 0<br>-10<br>-25   | 1166<br>920<br>294                         | 1038<br>420<br>225 | 476 (400th, 0.5C)                           | (13)             |
| PP                             | Ni@C/<br>graphene        | -40<br>-50        | /                                          | /                  | 354 (200th, 0.1C)<br>274 (400th, 0.1C)      | (14)             |
| AAPP/CB@P<br>P@LAGP            | 70% S/CB                 | 0<br>-20          | /                                          | /                  | 800.7 (100th, 0.5C)<br>372.2 (100th, 0.5C)  | (15)             |
| <b>MCNs-MoP</b>                | <b>80%S/<br/>Super C</b> | <b>-40</b>        |                                            |                    | <b>350.2(100th, 0.1C)</b>                   | <b>This work</b> |

## References

- 1 L.Y. Luo, X.Y. Qin, J.X. Wu, G.M. Liang, Q. Li, M. Liu, B.H. Li, An interwoven MoO<sub>3</sub>@CNT Scaffold Interlayer for High-Performance Lithium-Sulfur Batteries. *J. Mater. Chem. A*. 2018, 6, 8612-8619.
- 2 S. Imtiaz, Z.A. Zafar, R. Razaq, D. Sun, Y. Xin, Q. Li, Z.L. Zhang, L. Zheng, Y.H. Huang, J.A. Anderson, Electrocatalysis on Separator Modified by Molybdenum Trioxide Nanobelts for Lithium-Sulfur Batteries. *Adv. Mater. Interfaces*. 2018, 5, 1800243.
- 3 Z.A. Ghazi, X. He, A.M. Khattak, N.A. Khan, B. Liang, A. Iqbal, J.X. Wang, H. Sin, L.S. Li, Z.Y. Tang, MoS<sub>2</sub>/Celgard Separator as Efficient Polysulfide Barrier for Long-Life Lithium-Sulfur Batteries. *Adv. Mater.* 2017, 29, 1606817.
- 4 H.J. Peng, Z.W. Zhang, J.Q. Huang, G. Zhang, J. Xie, W.T. Xu, J.L. Shi, X. Chen, X.B. Cheng, Q. Zhang, A Cooperative Interface for Highly Efficient Lithium-Sulfur Batteries, *Adv. Mater.* 2016, 28, 9551-9558.
- 5 D. Tian, X.Q. Song, M.X. Wang, X. Wu, Y. Qiu, B. Guan, X.Z. Xu, L.S. Fan, N.Q. Zhang, K.N. Sun, MoN Supported on Graphene as a Bifunctional Interlayer for Advanced Li-S Batteries. *Adv. Energy Mater.* 2019, 9, 1901940.
- 6 N. Zheng, G.Y. Jiang, X. Chen, J.Y. Mao, N. Jiang, Y.S. Li, Battery Separators Functionalized with Edge-Rich MoS<sub>2</sub>/C Hollow Microspheres for the Uniform Deposition of Li<sub>2</sub>S in High-Performance Lithium-Sulfur Batteries. *Nano-Micro Lett.* 2019, 11, 43.
- 7 J.R. He, Y.F. Chen, A. Manthiram, Vertical Co<sub>9</sub>S<sub>8</sub> Hollow Nanowall Arrays Grown on a Celgard Separator as a Multifunctional Polysulfide Barrier for High-Performance Li-S Batteries. *Energy Environ. Sci.* 2018, 11, 2560-2568.
- 8 H.T. Li, Q. Jin, D.M. Li, X.H. Huan, Y.M. Liu, G.L. Feng, J. Zhao, W. Yang, Z.G. Wu, B.H. Zhong, X.D. Guo, B. Wang, Mo<sub>2</sub>C-Embedded Carambola-like N,S-Rich Carbon Framework as the Interlayer Material for High-Rate Lithium-Sulfur Batteries in a Wide Temperature Range. *ACS Appl. Mater. Interfaces*. 2020, 12, 22971-22980

- 9 M.X. He, X. Li, W.H. Li, M. Zheng, J.J. Wang, S.B. Ma, Y.L. Ma, G.P. Yin, P.J. Zuo, X.L. Sun, Immobilization and Kinetic Promotion of Polysulfides by Molybdenum Carbide in Lithium-Sulfur Batteries. *Chem. Engineering J.* 2021, 411, 128563.
- 10 J.L. Wang, W. Cai, X.W. Mu, L.F. Han, N. Wu, C. Liao, Y.C. Kan, Y. Hu, Designing of Multifunctional and Flame Retardant Separator towards Safer High-Performance Lithium-Sulfur Batteries. *Nano Res.* 2021, 14, 4865-4877
- 11 Z.F. Zhou, B.B. Chen, T.T. Fang, Y. Li, Z.F. Zhou, Q.J. Wang, J.J. Zhang, Y.F. Zhao, A Multifunctional Separator Enables Safe and Durable Lithium/Magnesium-Sulfur Batteries under Elevated Temperature. *Adv. Energy Mater.* 2020, 10, 1902023
- 12 C.Y. Fan, Y.P. Zheng, X.H. Zhang, Y.H. Shi, S.Y. Liu, H.C. Wang, X.L. Wu, H.Z. Sun, J.P. Zhang, High-Performance and Low-Temperature Lithium-Sulfur Batteries: Synergism of Thermodynamic and Kinetic Regulation. *Adv. Energy Mater.* 2018, 8, 1703638
- 13 P. Zeng, C. Liu, C. Cheng, C. Yuan, K. Dai, J. Mao, L.R. Zheng, J. Zhang, L.Y. Chang, S.C. Haw, T.S. Chan, H.P. Lin, L. Zhang, Propelling Polysulfide Redox Conversion by d-Band Modulation for High Sulfur Loading and Low Temperature Lithium-Sulfur Batteries. *J. Mater. Chem. A.* 2021, 9, 18526-18536
- 14 Z. Yu, B.L. Wang, X.B. Liao, K.N. Zhao, Z.F. Yang, F.J. Xia, C.L. Sun, Z. Wang, C.Y. Fan, J.P. Zhang, Y.G. Wang, Boosting Polysulfide Redox Kinetics by Graphene-Supported Ni Nanoparticles with Carbon Coating. *Adv. Energy Mater.* 2020, 10, 2000907
- 15 C. Ma, Y.M. Feng, X.J. Liu, Y. Yang, L.J. Zhou, L.B. Chen, C.L. Yan, W.F. Wei, Dual-Engineered Separator for Highly Robust, All-Climate Lithium-Sulfur Batteries. *Energy Storage Mater.* 2020, 32, 46-54.
